# Supplementary material for: Household water treatment and safe storage – effectiveness and economics
Source: Copernicus journal article supplement (doi:10.5194/dwesd-8-143-2015), 2015-08-17
Supplement: Supplementary file 1 [file Graph Formation Data Final.xlsx]

## Sheet: Blad1
All							Ceramic	Bacteria	verschil	laagste	hoogste			biosand	BACTERIA	ref	verschil	laagste	hoogste		SODIS	bacteria	verschil	laagste	hoogste
Price	retail	verschil	laagste	hoogste				Tulipfilter (2013); Basic Water Needs (2014b)	0.1	3.95	4.05					Van der Zwaag, et al., (2009)	0.1	1.35	1.45			Sodis.ch (2011)	0.1	4.95	5.05
	Biosand filter	33	7	40				Simonis and Basson (2011)	1	1.95	2.95					Sauber et al., (2009)	0.1	0.75	0.85			Meyer and Reed (2004)	0.1	3.95	4.05
	Ceramic filter	28.13	1.87	30				Robers (2003)	0.1	1.95	2.05					Palmateer, G. (1999)	1	1	2			McGuigan, et al., (2012)	0.1	1.25	1.35
	SODIS	0.3	0	0.3				Potters for peasce (2014a)	0.1	2.85	2.95					Murphy et al., (2010a)	3	0	3			Martín-Domínguez, A. et al., (2005)	0.1	4.95	5.05
	US$/m3	verschil	laagste	hoogste				Oyanedel-Craver and Smith (2007)	5	2	7					Elliot et al., (2008)	0.1	1.85	1.95			Lonnen, J. et al., (2005)	0.1	3.95	4.05
	Biosand filter	0.08	0.07	0.15				Murphy, et al., (2010a)	2	0.5	2.5					Duke et al., (2006)	0.1	1.75	1.85			Joyce, McGuigan et al., (1996)	0.1	8.95	9.05
	Ceramic filter	4.9	0.3	5.2				Lantagne, D. (2001)	0.1	1.95	2.05					Baumgartner, et al. (2007)	0.1	0.7	0.8			Fujioka, R.S. and Yoneyama, B.S. (2002)	3.5	2.5	6
	SODIS	2.03	0	2.03				Brown, J., et al. (2008)	0.1	1.35	1.45					akvopedia (2014c); sswm.info (2014)	0.1	1.15	1.25			Dejung et al., (2007)	0.1	4.95	5.05
Efficiency	ref	verschil	laagste	hoogste				Bloem, S.C., et al., (2010)	0.1	7.15	7.25					Ahammed and Davra, (2011)	1	2	3			akvopedia (2013)	1	1	2
bacteria	Biosand filter	3	0	3				Viruses	verschil	laagste	hoogste				VIRUS							Acra et al. (1990)	0.1	2.95	3.05
	Ceramic filter	6.75	0.5	7.25				Van der Laan, et al., (2014)	1.4	0	1.4				Wang et al., (2014)	3	4	7				virus	verschil	laagste	hoogste
	SODIS	8	1	9				Lantagne (2001)	0.41	0.09	0.5				Elliot et al., (2008)	0.1	0.45	0.55				Sodis.ch (2011)	3	1	4
virus	Biosand filter	4	0	4				Brown, J. and Sobsey, M. (2010)	0.1	1.15	1.25				Elliot et al., (2008)	0.1	2.05	2.15				McGuigan, et al., (2012)	0.1	3.45	3.55
	Ceramic filter	2.4	0	2.4				Bloem, S.C., et al., (2009)	0.1	0.35	0.45				akvopedia (2014c); sswm.info (2014)	2	0	2				Heselgrave, W. et al., (2006)	0.06	4.29	4.35
	SODIS	7	0	7				Beilefeld, et al., (2010)	1.97	0.43	2.4											Fujioka, R.S. and Yoneyama, B.S. (2002)	2	1	3
																						Dejung et al., (2007)	1	0	1
																						Acra et al., (1990)	0.1	1.95	2.05
