# Supplementary material for: Household water treatment and safe storage – effectiveness and economics
Source: Copernicus journal article supplement (doi:10.5194/dwesd-8-143-2015), 2015-08-17
Supplement: Supplementary file [file dwesd-8-143-2015-supplement-title-page.pdf › dwesd-8-143-2015-supplement-title-page.pdf]

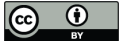

## *Supplement of*

# **Household water treatment and safe storage – effectiveness and economics**

**S. M. L. Stubbé et al.**

*Correspondence to:* S. Stubbé (stefaniestubbe@gmail.com) and A. Pelgrim-Adams (alida.adams@practica.org)

- dwesd-8-143-2015-supplement-title-page.pdf
- Excel Data for Graphs
  - Graph Formation Data Final.xlsx

The copyright of individual parts of the supplement might differ from the CC-BY 3.0 licence.
